# Supplementary material
Source: PubMed Central journal article supplement (PMC5771229)
Supplement: NIHMS928175-supplement-Supplemental_data.pdf [file NIHMS928175-supplement-Supplemental_data.pdf]

Supporting Information

## Engineering of Bacteriophage T4 Genome Using CRISPR-Cas9

Pan Tao\*, Xiaorong Wu, Wei-Chun Tang, Jingen Zhu, Venigalla Rao\*

Department of Biology, The Catholic University of America, Washington, DC 20064, USA

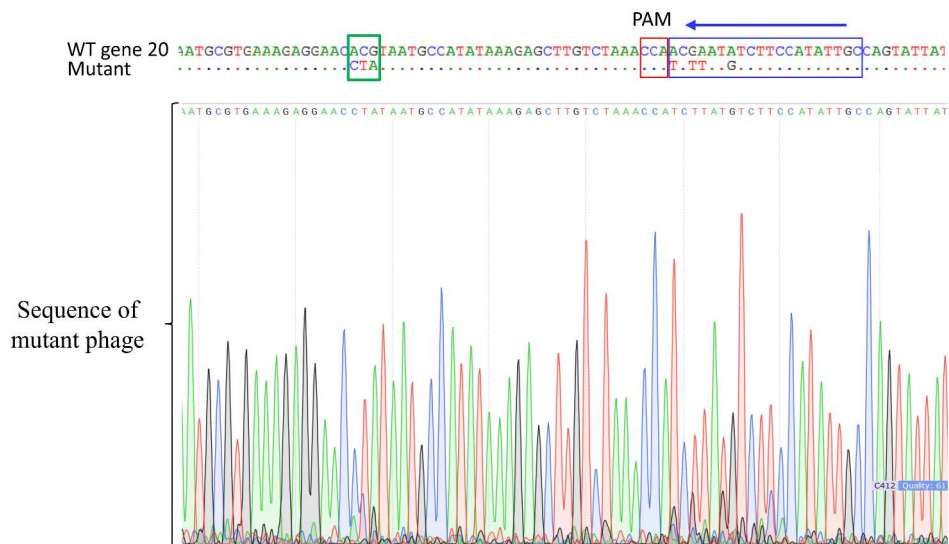

200x113mm (768 x 768 DPI)

**Figure S1. Generation of ag20 amber mutant by CRISPR-Cas editing.** *E. coli* B40 containing the spacer 20-1070 (Figure 2 and Table 1 in text) was infected with 500 PFU WT T4 according to the basic scheme shown in Figure 1 of the text. Plaques generated were purified, amplified by PCR, and sequenced. Sequencing shows the presence of amber mutation in the edited plaque. The blue arrow shows the 5' to 3' direction of the spacer sequence marked with a blue box. The PAM sequence and amber mutation are marked with red and green boxes, respectively.

## Supplementary Table 1. Primers used for donor DNA constructions

| Primers            | Sequence (5' to 3')                                                               |
|--------------------|-----------------------------------------------------------------------------------|
| 23FW               | TCAT <u>AGATCT</u> cacaaatgactatcaaaactaaagc                                      |
| 23BW               | CTA <u>GGATCC</u> cgtagagattagataccttaac                                          |
| 23am FW            | gtc <u>ccat</u> atgtagctctgactccgctgctggttccgatccg<br>aagaacttcTaGccAgtGatgggattc |
| segD BW            | ACT <u>CTCGAG</u> aatcatatacaaacggagtgatg                                         |
| 50Bgl FW:          | ATCG <u>AGATCT</u> ctccatgtagctctgactcc                                           |
| 100Bgl FW:         | ATCG <u>AGATCT</u> cactgtaggtataaaggctcc                                          |
| 200Bgl FW:         | ATCG <u>AGATCT</u> ctaccggctttagcactgatac                                         |
| 500Bgl FW:         | ATCG <u>AGATCT</u> aaatcaaccgtgaagttgtg                                           |
| 50Xho BW:          | GTG <u>CTCGAG</u> cggattctgcaaatgggttg                                            |
| 100Xho BW:         | GTG <u>CTCGAG</u> cagaatagaaggcataccgc                                            |
| 200Xho BFW:        | GTG <u>CTCGAG</u> aagggaacccgaaggttccc                                            |
| 500Xho BW:         | GTG <u>CTCGAG</u> caaaggcaaaaacaggcgt                                             |
| rnIB FW            | GTG <u>CTCGAG</u> cctttcggtccctttttatttaac                                        |
| rnIB BW            | gttataaaagtatagcagcttg                                                            |
| rnIB <u>amDSFW</u> | agc gaattc gGA aaa <u>Tac CtA</u> ataagatacaaccgctgag                             |
| 24.3 Xba BW        | GTT <u>TCTAGA</u> gtatataatggcaccaactcg                                           |
| 24.2EcoR FW        | TCC <u>gaattc</u> TTA TTA gtgttttaccttggtcagctgc                                  |
| HocXba BW          | GTT <u>TCTAGA</u> ggctaattgttacgggtgctc                                           |
